# Supplementary material
Source: ML conference proceedings conference paper supplement (https://openaccess.thecvf.com/content/CVPR2023/html/Jin_Deep_Incomplete_Multi-View_CVPR_2023_paper.html)
Supplement: Supplementary file 1 [file Jin_Deep_Incomplete_Multi-View_CVPR_2023_supplemental.pdf]

# Supplementary Material for Deep Incomplete Multi-view Clustering with Cross-view Partial Sample and Prototype Alignment

Jiaqi Jin<sup>1</sup>, Siwei Wang<sup>1</sup>, Zhibin Dong<sup>1</sup>, Xinwang Liu<sup>1,\*</sup>, En Zhu<sup>1,\*</sup>

<sup>1</sup>School of Computer, National University of Defense Technology, Changsha, China  
{jinjaqi, wangsiwei13, dzb20, xinwangliu, enzhu}@nudt.edu.cn

## 1. Introduction

In this supplementary material, we provide the main notations used in the paper and elaborate the implementation details of CPSPAN in the clustering process in more detail than the original paper. In addition, in order to further verify the effectiveness of the proposed CPSPAN, we conduct some additional experiments and analyses.

## 2. Notations

In this section, we supplement the main notations used in the whole paper in Table 1 for reference.

Table 1. Basic notations used in the whole paper.

| Notation                                                         | Meaning                                                              |
|------------------------------------------------------------------|----------------------------------------------------------------------|
| $N$                                                              | number of instances                                                  |
| $K$                                                              | number of clusters                                                   |
| $V$                                                              | number of views                                                      |
| $D_v$                                                            | dimension of instances in $v$ -th view                               |
| $\mathbf{X}^{(v)} \in \mathbb{R}^{N \times D_v}$                 | data matrix for the $v$ -th view                                     |
| $\tilde{\mathbf{X}}^{(v)} \in \mathbb{R}^{N_v \times D_v}$       | complete data for the $v$ -th view                                   |
| $N_v$                                                            | number of complete instances for the $v$ -th view                    |
| $\mathbf{X}_p^{(i,j)}$                                           | paired instances of view $i$ and $j$                                 |
| $\mathbf{X}_u^{(i,j)}$                                           | unpaired instances of view $i$ and $j$                               |
| $N^{(i,j)}$                                                      | number of instances in $\mathbf{X}_p^{(i,j)}$                        |
| $d$                                                              | dimension of embeddings                                              |
| $\mathbf{H}^{(v)} \in \mathbb{R}^{N_v \times d}$                 | embedding for the $v$ -th view                                       |
| $\mathbf{C}^{(v)} \in \mathbb{R}^{K \times d}$                   | prototype set for the $v$ -th view                                   |
| $\mathbf{S}^{(i,j)} \in \mathbb{R}^{N^{(i,j)} \times N^{(i,j)}}$ | similarity matrix of the paired instances between view $i$ and $j$   |
| $\mathbf{P}^{(i,j)} \in \mathbb{R}^{K \times K}$                 | permutation matrix between $\mathbf{C}^{(i)}$ and $\mathbf{C}^{(j)}$ |
| $E_v(\cdot)$                                                     | encoder for the $v$ -th view                                         |
| $D_v(\cdot)$                                                     | decoder for the $v$ -th view                                         |

\*Corresponding author

## 3. Implementation Details for Clustering

For the proposed CPSPAN, the same autoencoder network structure are adopted for all datasets. Concretely, for the  $v$ -th view, the network structure is denoted as  $\tilde{\mathbf{X}}^{(v)} \rightarrow \text{FC}_{500} \rightarrow \text{FC}_{500} \rightarrow \text{FC}_{2000} \rightarrow \mathbf{H}^{(v)} \rightarrow \text{FC}_{2000} \rightarrow \text{FC}_{500} \rightarrow \text{FC}_{500} \rightarrow \hat{\mathbf{X}}^{(v)}$ . We set the dimensionality of embeddings  $\mathbf{H}^{(v)}$  to 10 for all views. ReLU is utilized as the activation function. The training of the model is divided into two stages, namely the pre-training stage and the partial sample and prototype alignment stage. We used Adam as the optimizer for the entire training process. For a fair comparison, the mean values of 10 runs are reported for all datasets. In addition, we implement our approach using the public toolkit of PyTorch 1.7.1 on a desktop with Windows 10 system and RTX 3080 Graphics Processing Units as well as 64GB memory.

## 4. Additional Experiments

### 4.1. Comparison with State-of-The-Arts Under Other Missing Rates

In this section, we conduct comparative experiments with the seven state-of-the-art algorithms under the condition that the missing rate are set to 0.2, 0.4, 0.6, 0.8 and 0.9. The experimental results are displayed in Table 2. From these results, we can observe that our proposed CPSPAN can still show advanced performance under other missing rates, especially when the missing rate is 0.8 or even 0.9.

### 4.2. Structure-filling Method versus Mean-filling Method

In order to verify that our proposed structure embedding filling strategy is more effective than other embedding filling methods, we compare it with the mean-filling strategy when the missing rate is 0.5. From the Table 3, We found that the structure embedding filling strategy is obviously better than the mean embedding filling strategy.

Table 2. The clustering performance comparisons on five benchmark datasets with different missing ratios. The best results are highlighted in bold, while the second best results are marked with underlined numbers.

|              | Missing rates | 0.2          |              |              | 0.4          |              |              | 0.6          |              |              | 0.8          |              |              | 0.9          |              |              |
|--------------|---------------|--------------|--------------|--------------|--------------|--------------|--------------|--------------|--------------|--------------|--------------|--------------|--------------|--------------|--------------|--------------|
|              |               | ACC          | NMI          | F-meas       |
| Caltech101-7 | BSV           | 0.291        | 0.265        | 0.304        | 0.274        | 0.229        | 0.290        | 0.256        | 0.188        | 0.274        | 0.242        | 0.160        | 0.263        | 0.230        | 0.141        | 0.260        |
|              | PIC           | 0.715        | <u>0.747</u> | 0.704        | 0.619        | 0.644        | 0.622        | <u>0.785</u> | <u>0.727</u> | <u>0.733</u> | 0.764        | 0.697        | 0.699        | 0.756        | 0.677        | 0.683        |
|              | AWP           | <u>0.810</u> | 0.720        | 0.727        | <u>0.820</u> | <u>0.713</u> | 0.727        | 0.765        | 0.691        | 0.695        | <u>0.768</u> | <u>0.698</u> | <u>0.702</u> | <u>0.774</u> | <u>0.698</u> | <u>0.708</u> |
|              | CPM-Nets      | <u>0.775</u> | 0.645        | <u>0.775</u> | 0.750        | 0.631        | <u>0.750</u> | 0.604        | 0.481        | 0.604        | 0.589        | 0.468        | 0.589        | 0.518        | 0.426        | 0.518        |
|              | COMPLETER     | 0.724        | 0.595        | 0.724        | 0.631        | 0.548        | 0.631        | 0.571        | 0.559        | 0.596        | 0.432        | 0.465        | 0.484        | 0.287        | 0.292        | 0.343        |
|              | DCP           | 0.655        | 0.662        | 0.666        | 0.451        | 0.593        | 0.551        | 0.466        | 0.539        | 0.520        | 0.160        | 0.039        | 0.165        | 0.181        | 0.008        | 0.188        |
|              | DSIMVC        | 0.637        | 0.560        | 0.652        | 0.617        | 0.528        | 0.630        | 0.547        | 0.460        | 0.565        | 0.440        | 0.354        | 0.452        | 0.371        | 0.291        | 0.380        |
|              | CPSPAN        | <b>0.855</b> | <b>0.764</b> | <b>0.845</b> | <b>0.876</b> | <b>0.786</b> | <b>0.872</b> | <b>0.861</b> | <b>0.766</b> | <b>0.857</b> | <b>0.838</b> | <b>0.731</b> | <b>0.831</b> | <b>0.839</b> | <b>0.737</b> | <b>0.828</b> |
| HandWritten  | BSV           | 0.566        | 0.586        | 0.493        | 0.517        | 0.535        | 0.419        | 0.461        | 0.477        | 0.328        | 0.406        | 0.423        | 0.260        | 0.391        | 0.398        | 0.235        |
|              | PIC           | 0.839        | <u>0.842</u> | 0.791        | <u>0.822</u> | 0.817        | 0.760        | <u>0.833</u> | <u>0.856</u> | <u>0.815</u> | 0.780        | 0.792        | 0.751        | <u>0.842</u> | <u>0.866</u> | <u>0.825</u> |
|              | AWP           | 0.659        | 0.818        | 0.710        | 0.778        | <u>0.866</u> | <u>0.786</u> | 0.773        | 0.852        | 0.778        | <u>0.826</u> | <u>0.835</u> | <u>0.784</u> | 0.828        | 0.839        | 0.788        |
|              | CPM-Nets      | <u>0.863</u> | 0.781        | <u>0.863</u> | 0.780        | 0.681        | 0.780        | 0.673        | 0.585        | 0.673        | 0.635        | 0.513        | 0.635        | 0.565        | 0.487        | 0.565        |
|              | COMPLETER     | 0.839        | 0.755        | 0.839        | 0.692        | 0.723        | 0.723        | 0.613        | 0.644        | 0.650        | 0.579        | 0.618        | 0.620        | 0.305        | 0.346        | 0.361        |
|              | DCP           | 0.697        | 0.744        | 0.725        | 0.655        | 0.715        | 0.685        | 0.602        | 0.697        | 0.649        | 0.291        | 0.386        | 0.332        | 0.288        | 0.388        | 0.333        |
|              | DSIMVC        | 0.777        | 0.731        | 0.783        | 0.752        | 0.702        | 0.760        | 0.709        | 0.662        | 0.718        | 0.589        | 0.550        | 0.594        | 0.410        | 0.408        | 0.414        |
|              | CPSPAN        | <b>0.938</b> | <b>0.882</b> | <b>0.938</b> | <b>0.940</b> | <b>0.884</b> | <b>0.940</b> | <b>0.931</b> | <b>0.873</b> | <b>0.931</b> | <b>0.922</b> | <b>0.858</b> | <b>0.921</b> | <b>0.919</b> | <b>0.854</b> | <b>0.919</b> |
| ALOI-100     | BSV           | 0.387        | 0.743        | 0.239        | 0.346        | 0.741        | 0.237        | 0.302        | 0.741        | 0.236        | 0.283        | 0.740        | 0.236        | 0.285        | 0.741        | 0.237        |
|              | PIC           | <u>0.699</u> | 0.755        | 0.554        | 0.711        | 0.767        | <u>0.570</u> | <b>0.724</b> | <u>0.776</u> | <u>0.583</u> | <b>0.698</b> | <u>0.752</u> | <u>0.549</u> | <u>0.690</u> | <u>0.742</u> | <u>0.532</u> |
|              | AWP           | 0.682        | <u>0.796</u> | <b>0.693</b> | <u>0.679</u> | <u>0.784</u> | 0.568        | 0.674        | 0.757        | 0.538        | 0.660        | 0.737        | 0.525        | 0.656        | 0.726        | 0.505        |
|              | CPM-Nets      | 0.187        | 0.457        | 0.205        | 0.097        | 0.290        | 0.114        | 0.082        | 0.242        | 0.094        | 0.067        | 0.213        | 0.079        | 0.034        | 0.112        | 0.042        |
|              | COMPLETER     | 0.189        | 0.430        | 0.212        | 0.164        | 0.421        | 0.207        | 0.152        | 0.417        | 0.201        | 0.157        | 0.415        | 0.196        | 0.150        | 0.411        | 0.192        |
|              | DCP           | 0.246        | 0.492        | 0.279        | 0.241        | 0.480        | 0.266        | 0.207        | 0.454        | 0.231        | 0.207        | 0.454        | 0.231        | 0.200        | 0.439        | 0.225        |
|              | DSIMVC        | 0.306        | 0.599        | 0.322        | 0.299        | 0.572        | 0.313        | 0.274        | 0.542        | 0.287        | 0.257        | 0.517        | 0.269        | 0.235        | 0.496        | 0.246        |
|              | CPSPAN        | <b>0.701</b> | <b>0.856</b> | <u>0.675</u> | <b>0.680</b> | <b>0.848</b> | <b>0.659</b> | <u>0.693</u> | <b>0.845</b> | <b>0.667</b> | <u>0.690</u> | <b>0.848</b> | <b>0.662</b> | <b>0.715</b> | <b>0.855</b> | <b>0.695</b> |

Table 3. Comparison with mean embedding filling method. We select ACC as the evaluation metric. (The missing rate is 0.5)

|              | Structure Filling | Mean Filling |
|--------------|-------------------|--------------|
| Caltech101-7 | 0.861             | 0.522        |
| HandWritten  | 0.936             | 0.530        |
| ALOI-100     | 0.709             | 0.316        |

### 4.3. Influence of Embedding Dimension

In the last step of our CPSPAN, we first adopt the structure embedding filling method to concatenate the embedding of each view, and finally use kmeans to cluster to get the final result. Therefore, in this section, we study the impact of the embedding dimension of each view on the clustering results. To assess the impact of dimensions, we change the dimensionality of the representation in the range of 32, 64, 128, 256. The missing rate is fixed to 0.5. The results in Table 4 verify that in most cases, too large or too small dimensionality can cause performance degradation. Our analysis shows that small dimensionality will lose information, while too large dimensionality will contain a lot of redundant information.

Table 4. Impact of embedding dimension on clustering results. The best results are highlighted in bold. (The missing rate is 0.5)

| Dataset      | Dimension | ACC          | NMI          | F-meas       |
|--------------|-----------|--------------|--------------|--------------|
| Caltech101-7 | 8         | 0.851        | 0.754        | 0.844        |
|              | 10        | 0.861        | 0.775        | 0.856        |
|              | 16        | <b>0.895</b> | <b>0.810</b> | <b>0.892</b> |
|              | 32        | 0.875        | 0.787        | 0.871        |
|              | 64        | 0.867        | 0.787        | 0.871        |
|              | 128       | 0.891        | 0.809        | 0.887        |
| HandWritten  | 8         | 0.904        | 0.863        | 0.901        |
|              | 10        | <b>0.936</b> | <b>0.879</b> | <b>0.935</b> |
|              | 16        | 0.880        | 0.853        | 0.875        |
|              | 32        | 0.930        | 0.870        | 0.930        |
|              | 64        | 0.842        | 0.832        | 0.835        |
|              | 128       | 0.853        | 0.841        | 0.844        |
| ALOI-100     | 8         | 0.703        | 0.854        | 0.678        |
|              | 10        | 0.709        | <b>0.864</b> | 0.679        |
|              | 16        | <b>0.716</b> | <b>0.864</b> | <b>0.685</b> |
|              | 32        | 0.680        | 0.854        | 0.651        |
|              | 64        | 0.692        | 0.856        | 0.665        |
|              | 128       | 0.707        | <b>0.864</b> | 0.678        |
